# Supplementary material for: Influence of Adiposity-Related Genetic Markers in a Population of Saudi Arabians Where Other Variables Influencing Obesity May Be Reduced
Source: Hindawi journal article supplement (doi:10.1155/2014/758232), 2014-01-01
Supplement: f1 [file 758232.f1.pdf]

Supplementary Table 1: Odds Ratios for overweight vs lean subjects in a population of Saudi individuals for 11 SNPs

| <b>SNP</b>                   | <b>OR (SE)</b> | <b>95% CI</b> | <b>P-value</b> |
|------------------------------|----------------|---------------|----------------|
| rs10767664 ( <i>BDNF</i> )   | 1.029 (0.264)  | 0.62 – 1.70   | 0.912          |
| rs3751812 ( <i>FTO</i> )     | 1.381 (0.338)  | 0.86 – 2.23   | 0.187          |
| rs9939609 ( <i>FTO</i> )     | 1.335 (0.326)  | 0.83 – 2.16   | 0.237          |
| rs9941349 ( <i>FTO</i> )     | 1.295 (0.318)  | 0.80 – 2.10   | 0.293          |
| rs10938397 ( <i>GNPDA2</i> ) | 1.622 (0.399)  | 1.00 – 2.62   | 0.049          |
| rs571312 ( <i>MC4R</i> )     | 1.052 (0.296)  | 0.61 – 1.82   | 0.856          |
| rs2815752 ( <i>NEGR1</i> )   | 1.189 (0.342)  | 0.68 – 2.09   | 0.548          |
| rs713586 ( <i>RBJ</i> )      | 1.286 (0.331)  | 0.78 – 2.13   | 0.329          |
| rs543874 ( <i>SEC16B</i> )   | 1.496 (0.589)  | 0.69 – 3.24   | 0.307          |
| rs7359397 ( <i>SH2B1</i> )   | 0.867 (0.288)  | 0.451 – 1.66  | 0.668          |
| rs2867125 ( <i>TMEM18</i> )  | 1.187 (0.359)  | 0.66 – 2.15   | 0.571          |

- OR – Odds Ratio, SE – Standard Error, CI – Confidence Interval
